# Supplementary material for: The role of collaborative argumentation in future teachers' selection of online information
Source: Atypon-hosted journal article supplement (doi:10.1024/1010-0652/a000307), 2021-02-12
Supplement: 1010-0652_a000307_esm1.pdf [file 1010-0652_a000307_esm1.pdf]

## Instructions

*Table 1.* Instruction on the scenario (green text indicates what was added in the collaborative group but was not present in instructions for the individual group)

### **Imagine the following situation:**

In Europe, Germany and the individual federal states of Germany, **the use of mobile phones in class** is handled very differently. Whether cell phones are allowed in the classroom without restrictions, or can only be used with certain rules, or even banned entirely, varies from school to school.

Your school wants to rethink how to use mobile phones in classes. Parts of the teaching staff will therefore meet soon. It should be discussed whether mobile phones should be allowed or prevented in a certain way in classes.

You are very interested in the **pedagogical reasons for any use or a ban on mobile phones in the classroom** and would like to discuss the topic with your colleagues.

In order to be able to give a **reasoned assessment** of the topic, you would like to find out more about the topic on the Internet. You are interested in pedagogical approaches and explanations, as well as the advantages and disadvantages of using mobile phones in classes. You hope to get a first overview of the topic.

A friend of yours, also a teacher, would also like to attend the meeting and discuss future rules about mobile phone use. Together you decide to share your research on the Internet. You first want to search for information individually and then share ideas about the topic and your search results together.

You are using your time until your date in the evening and are starting your research. Click on "Continue"!

*Table 2.* Instructions for the Web search (blue text shows the additional text given in the instructions for the individual group).

**Time of Research:**

In the next **20 minutes**, search for information on the topic on the Internet.

Select **two (four) Web items** that you think are relevant and useful in order to be able to give a reasoned assessment of the topic 'mobile phone use in class'.

We are interested in your actual search behavior and there are no right or wrong procedures. Think of an **ordinary research situation in a teacher's everyday life**.

You can search for all content on the Web that you consider relevant (e.g., documents, texts, data, applications, e-services, images, audio and video files, personal websites, etc.).

Make sure you are wearing your headphones and do your research now. To do this, use the open Web browser window with the University homepage.

**Keep the relevant Web content open in the Browser!** You will need the links of the two selected Web items later in this investigation.

Click on "Next" when you have searched for information for 20 minutes.

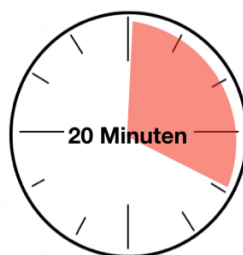

*Table 3.* Instruction on the reasoning task (blue text shows the added text given in the instructions for the individual group; green text show the added text given in the instructions for the collaborative group).

**Reasoning of selection of Web items:**

You now have **30 minutes** to reason your choice of Web items **together with your colleague via chat.**

**1. Reason and discuss** the relevance of the two **(four)** Web items and the criteria you used to select them. What criteria show you that the Web item is relevant?

As a reminder, the selected Web items are as follows:

1. selected Web item = # parameter for first link #
2. selected Web item = # parameter for second link #
3. selected Web item = # parameter for third link #
4. selected Web item = # parameter for fourth link #

**2. Together,** select the two most relevant Web items. Which two are the most suitable to be able to give a reasoned assessment of whether and how your school should handle mobile phone use in the classroom in the future?

Note on the timing: From previous experiments, we know that people need about **30 minutes for such a reasoning task.** Therefore, please take enough time to give reasons for your selection.

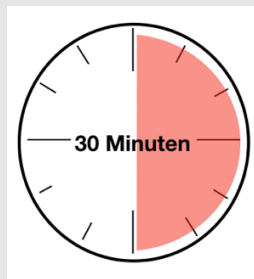

**Please give reasons for your selection and which criteria you used.**

**You have 30 minutes to do so.**

**Click on "Next" when you have justified and discussed your selection of Web items collaboratively in the chat.**
