# Supplementary material for: The role of collaborative argumentation in future teachers' selection of online information
Source: Atypon-hosted journal article supplement (doi:10.1024/1010-0652/a000307), 2021-02-12
Supplement: 1010-0652_a000307_esm2.pdf [file 1010-0652_a000307_esm2.pdf]

### **Description of trust-related and attitudinal measures**

We assessed trust-related and attitudinal measures, to exploratorily describe the features of the selected Web items (WI) and their impact on participants' opinions: 1) self-perceived credibility of information, provider, and media; 2) opinion toward mobile phone usage; and 3) certainty of participants' opinion.

For each of the participants' four selected WI, we asked participants to judge the WI's information credibility in terms of six items (e.g., 'The Web content entails all the necessary information') (Cronbach's  $\alpha = .78 - .83$ ). We also asked them to judge the trustworthiness of the provider regarding four items (e.g., 'The person behaves scientifically') (Cronbach's  $\alpha = .77 - .91$ ), and the credibility of the media, in terms of seven items (e.g., 'The website is kept up to date') (Cronbach's  $\alpha = .69 - .73$ ). All items were assessed on a 5-point-Likert, scale ranging from 1 = 'I strongly disagree' to 5 = 'I strongly agree'.

Participants' opinion toward mobile phone usage in class were assessed via an open question. The content of the response was coded according to whether the participant's opinion 1) supported a rule-based mobile phone usage in class, 2) opposed any usage in class, or 3) neither supported nor opposed the usage in class. We also assessed participants' certainty of their opinion on six items (e.g., 'My appraisal helps me discuss the topic with others') and participants' self-reported intrinsic motivation during the reasoning task—in retrospect—on four items (e.g., 'Working on the task was fun').

### **Descriptive results in terms of the trust-related and attitudinal measures**

In terms of the features of the WI, participants ascribed relatively high credibility and trustworthiness judgements to the information, the provider, and the media. These ranged from  $M = 3.4$  ( $SD = .67$ ) for the credibility of media of the second selected WI to  $M = 4.01$  ( $SD =$

.64) for the trustworthiness of the provider of the second selected WI. There were no significant differences between the experimental conditions (see Table 1).

After the reasoning task, most participants ( $n = 62$ ) stated they were in favor of rule-based mobile phone usage in class (23 participants in the individual and 39 in the discourse group agreed). Another six participants in the individual and ten in the discourse group stated that they were neither for nor against rule-based usage, with no significant differences between the experimental conditions,  $\chi^2(1) = 3.598, p = .165, \phi = .040$ . Interestingly, eight participants from both groups stated explicitly that they were influenced by the searching and reasoning task. Participants' self-reported certainty in their opinions did not differ between the groups, nor did their self-reported intrinsic motivation during the reasoning task (see Table 1 below).

Table 1. Multivariate ANOVA to test for differences between experimental conditions for trust-related and attitudinal measures.

| Source                  | Dependent Variable                                                                              | Type III Sum of Squares | df | Mean Square | F    | p   | $\eta^2_{\text{part}}$ |
|-------------------------|-------------------------------------------------------------------------------------------------|-------------------------|----|-------------|------|-----|------------------------|
| Experimental conditions | Scale of all trust-related measures for the two Web items chosen for the reasoning analysis     | 0.18                    | 1  | 0.18        | 1.08 | .30 | < .01                  |
|                         | Scale of all trust-related measures for the two Web items not chosen for the reasoning analysis | 0.77                    | 1  | 0.77        | 3.57 | .06 | .04                    |
|                         | Trustworthiness of provider for the first selected Web item                                     | 0.12                    | 1  | 0.12        | < 1  | .67 | < .01                  |
|                         | Trustworthiness of provider for the second selected Web item                                    | 0.29                    | 1  | 0.29        | < 1  | .41 | < .01                  |
|                         | Trustworthiness of provider for the third selected Web item                                     | 0.40                    | 1  | 0.40        | < 1  | .41 | < .01                  |
|                         | Trustworthiness of provider for the fourth selected Web item                                    | 3.23                    | 1  | 3.23        | 4.80 | .03 | .05                    |
|                         | Credibility of information for the first selected Web item                                      | 0.03                    | 1  | 0.03        | < 1  | .74 | < .01                  |
|                         | Credibility of information for the second selected Web item                                     | 0.17                    | 1  | 0.17        | < 1  | .45 | < .01                  |
|                         | Credibility of information for third selected Web item                                          | 0.14                    | 1  | 0.14        | < 1  | .55 | < .01                  |
|                         | Credibility of information for the fourth selected Web item                                     | 1.9                     | 1  | 1.86        | 4.12 | .05 | .05                    |
|                         | Credibility of media for the first selected Web item                                            | 0.01                    | 1  | 0.01        | < 1  | .88 | < .01                  |
|                         | Credibility of media for the second selected Web item                                           | 2.24                    | 1  | 2.24        | 6.64 | .01 | .08                    |
|                         | Credibility of media for third selected Web item                                                | 0.33                    | 1  | 0.33        | < 1  | .33 | .01                    |
|                         | Credibility of media for the fourth selected Web item                                           | 0.29                    | 1  | 0.29        | < 1  | .43 | < .01                  |
