# Supplementary material for: The role of collaborative argumentation in future teachers' selection of online information
Source: Atypon-hosted journal article supplement (doi:10.1024/1010-0652/a000307), 2021-02-12
Supplement: 1010-0652_a000307_esm3.pdf [file 1010-0652_a000307_esm3.pdf]

**Coding of participants' argumentative reasoning behavior and examples of participants' comments for the individual and collaborative reasoning task (English translation in parentheses).**

*Table 1.* Exemplary reasoning behavior, with comments on criteria related to the information in the Web content (i.e., correctness, completeness, appropriateness, scientificness, two-sided, recency).

| Participant's reasoning behavior in the individual group                                                                                                                                              |                                                                                                                                                                                              | Participant's reasoning behavior in the collaborative discourse group                                                                                                                                                                 |                                                                                                                                                                                              |
|-------------------------------------------------------------------------------------------------------------------------------------------------------------------------------------------------------|----------------------------------------------------------------------------------------------------------------------------------------------------------------------------------------------|---------------------------------------------------------------------------------------------------------------------------------------------------------------------------------------------------------------------------------------|----------------------------------------------------------------------------------------------------------------------------------------------------------------------------------------------|
| elaborated                                                                                                                                                                                            | unelaborated                                                                                                                                                                                 | elaborated                                                                                                                                                                                                                            | unelaborated                                                                                                                                                                                 |
| Vorsichtig sollte man ebenfalls beim Datum der gewonnenen Informationen sein, da beispielsweise insbesondere im Feld der Medienpädagogik stetig neue Informationen und Erkenntnisse erscheinen können | Die Inhalte auf der Seite zeigen ganz genau die Vorteile das Handy im Unterricht zu benutzen<br><br>(The content on the pages shows exactly the advantages of using the cell phone in class) | Jedoch bietet dein Link eine große Bandbreite an Informationen und möglicherweise bedeutsamen Fakten. Fakten spielten in der Diskussion hingegen ein untergeordnete Rolle, da es eher um die alltägliche Leben und ihre Realität geht | Das war so eine art Broschüre über den Umgang mit Handys im Unterricht; Herangehensweise und so<br><br>(It was kind of a brochure about how to use cell phones in class; approach and stuff) |
| (One should also be careful with the date of the information obtained, for example, especially in the field of media education, new information and insights can appear constantly)                   |                                                                                                                                                                                              | (However, your link offers a wide range of information and possibly important facts. However, facts played a subordinate role in the discussion, since it is more about everyday life and its reality)                                |                                                                                                                                                                                              |

*Table 2.* Reasoning behavior, with comments on criteria related to the provider of information of the Web content (i.e., competence, benevolence, integrity, scientificness)

| Participant's reasoning behavior in the individual group                                                                                                                                                                                                                                                                                                                                                                                                                                                                          |                                                                                                                                                                                                                                                                                                         | Participant's reasoning behavior in the collaborative discourse group                                                                                                                                                                                                                                                                                                                          |                                                                                                                                                                                                   |
|-----------------------------------------------------------------------------------------------------------------------------------------------------------------------------------------------------------------------------------------------------------------------------------------------------------------------------------------------------------------------------------------------------------------------------------------------------------------------------------------------------------------------------------|---------------------------------------------------------------------------------------------------------------------------------------------------------------------------------------------------------------------------------------------------------------------------------------------------------|------------------------------------------------------------------------------------------------------------------------------------------------------------------------------------------------------------------------------------------------------------------------------------------------------------------------------------------------------------------------------------------------|---------------------------------------------------------------------------------------------------------------------------------------------------------------------------------------------------|
| elaborated                                                                                                                                                                                                                                                                                                                                                                                                                                                                                                                        | unelaborated                                                                                                                                                                                                                                                                                            | elaborated                                                                                                                                                                                                                                                                                                                                                                                     | unelaborated                                                                                                                                                                                      |
| <p>Außerdem erschien mir Philippe Wampfler bei ersten Recherchen als eine häufiger zitierte Person im Zusammenhang mit Handynutzung im Unterricht. Daher empfand ich es als wichtig, seine Argumente und wissenschaftlichen Erkenntnisse mit in Betracht zu ziehen</p> <p>(In addition, Philippe Wampfler appeared to me during my first research as a more frequently cited person in connection with cell phone use in class. So I felt it was important to take his arguments and scientific knowledge into consideration)</p> | <p>Das Buch enthält außerdem verschiedene Artikel von Experten aus verschiedenen Branchen, von Ärzten zu Lehrern, Erziehungswissenschaftlern und so weiter</p> <p>(The book also contains various articles by experts from various industries, from doctors to teachers, educationalists and so on)</p> | <p>Beim zweiten finde ich gut, dass man weiß wer die Autorin ist und das sie anscheinend in ihrem studium sich damit beschäftigt hat aber bis auf die studie gibt es keine Quellenverweise</p> <p>(In the second, I think it's good that you know who the author is and that she apparently dealt with it during her studies, but apart from the study there are no references to sources)</p> | <p>Ich persönlich halte zunächst einmal die Quellen meiner Inhalte für glaubwürdig und relevant</p> <p>(First of all, I personally think the sources of my content are credible and relevant)</p> |

Table 3. Reasoning behavior, with comments on criteria related to the media of the Web content (e.g., design, usability...)

| Participant's reasoning behavior in the individual group                                                                                                                                                                                                                                          |                                                                                                                                                                                                                                                                                                        | Participant's reasoning behavior in the collaborative discourse group                                                                                                                                                                                                                                                                                           |                                                                                                                                 |
|---------------------------------------------------------------------------------------------------------------------------------------------------------------------------------------------------------------------------------------------------------------------------------------------------|--------------------------------------------------------------------------------------------------------------------------------------------------------------------------------------------------------------------------------------------------------------------------------------------------------|-----------------------------------------------------------------------------------------------------------------------------------------------------------------------------------------------------------------------------------------------------------------------------------------------------------------------------------------------------------------|---------------------------------------------------------------------------------------------------------------------------------|
| elaborated                                                                                                                                                                                                                                                                                        | unelaborated                                                                                                                                                                                                                                                                                           | elaborated                                                                                                                                                                                                                                                                                                                                                      | unelaborated                                                                                                                    |
| Die Ausgabe der Fachzeitschrift <i>Fremdsprache Deutsch</i> hält verschiedene Artikel bereit, die sich aber nicht nur mit der Nutzung des Smartphones im Unterricht auseinandersetzen. Welche Artikel im einzelnen relevant sind bleibt zunächst einmal offen und bedarf einer weiteren Recherche | [...] und dass es sich bei der Quelle WELT um eine populäres Medium in Deutschland handelt, was Nachrichten (auch zu Debatten wie dem Handyverbot) angeht.“<br><br>([...] and that Quelle WELT is a popular medium in Germany when it comes to news [including debates such as the ban on cellphones]) | Ich hab den WELT Artikel genommen, weil ich ihn ausführlich fand und auch das Gefühl hatte er ist gut recherchiert mit hinweisen auf verschiedene Studien, auf die man auch zugreifen konnte<br><br>(I took the WELT article because I found it elaborated and I felt that it was well researched with references to various studies that were also accessible) | also kanntest du WELT und HANDELSBLAT als Quellen schon?<br><br>(So did you already know the WELT and HANDELSBLATT as sources?) |
| (The issue of the journal <i>Fremdsprache Deutsch</i> contains various articles, which do not only deal with the use of smartphones in the classroom. Which articles are relevant in the first place remains open and requires further research)                                                  |                                                                                                                                                                                                                                                                                                        |                                                                                                                                                                                                                                                                                                                                                                 |                                                                                                                                 |

Table 4. Example of a collaborative argumentative reasoning behavior (English translation in parentheses)

| Code                                                                       | Speaker | Utterance                                                                                                                                                                                                                                                                                                                                                                                   |
|----------------------------------------------------------------------------|---------|---------------------------------------------------------------------------------------------------------------------------------------------------------------------------------------------------------------------------------------------------------------------------------------------------------------------------------------------------------------------------------------------|
| State/elab/provider<br>State/elab/information                              | A       | - deinen link aus dem magazin finde ich ganz gut. autorin ist genannt<br>- und zeigt stichpunktartig die pro und contras auf                                                                                                                                                                                                                                                                |
| State/elab/provider<br>State/elab/information                              |         | (- I think your link from the magazine is quite good. the author is named<br>- and it shows briefly the pros and cons)                                                                                                                                                                                                                                                                      |
| State/elab/information                                                     | B       | - Ich finde deine Quellen hatten eine solide wissenschaftliche Grundlage. Von daher erstmal vertrauenswürdig.                                                                                                                                                                                                                                                                               |
| State/elab/information                                                     |         | - Ja, Primus ist im allgemeinen eine gute Quelle, würde ich sagen. [in Bezug auf das Gesagte von A zu Primus]                                                                                                                                                                                                                                                                               |
| State/elab/information                                                     |         | - Ja, bei dem ersten Link von mir war ich mir erstmal nicht sicher, aber es zähl die Vorsteile und Nachteile ganz gut auf, von daher als erste Übersicht ziemlich nützlich und man kann dann weiter nachaken.                                                                                                                                                                               |
| State/elab/provider                                                        |         | - laut dem Impressum wird das Projekt von der EU unterstützt, von daher fand ich die Webseite auch vertrauenerweckend.                                                                                                                                                                                                                                                                      |
| State/elab/information                                                     |         | - Die zweite Quelle sollte dann einen wissenschaftlichen Charakter haben und mehr in die Tiefe gehen.                                                                                                                                                                                                                                                                                       |
| State/elab/information<br>State/elab/information<br>State/elab/information |         | (- I think your sources had a solid scientific foundation. So trustworthy at first.<br>- Yes, Primus is a good source in general, I would say. [with regard to the former comments of A on Primus]<br>- Yes, at the first link from me I was not sure at first, but it lists the advantages and disadvantages quite well, so it's pretty useful as a first overview and you can then go on. |
| State/elab/provider<br>State/elab/information                              |         | - According to the imprint, the project is supported by the EU, so I found the website to inspire confidence.<br>- The second source should then have a scientific character and go deeper.)                                                                                                                                                                                                |
| State/unelab/provider<br>State/elab/information                            | A       | - allgemein würde ich seiten von staatlichen unis fast immer vertrauen.<br>- vor allem wenn die inhalte auch in fachzeitschriften publiziert sein, finde deine recherche absolut sinnvoll                                                                                                                                                                                                   |
| State/unelab/provider<br>State/elab/information                            |         | (- in general, I would almost always trust websites of state universities.<br>- especially if the content is also published in specialist magazines. I find your research absolutely useful)                                                                                                                                                                                                |
| Statement/unelab/media                                                     | B       | - Ich benutze zur Suche auch ganz gerne Google Scholar, vor allem wenn es um englischsprachige Texte geht. Da wird man auch ganz gut fündig.                                                                                                                                                                                                                                                |
| Statement/unelab/media                                                     |         | (- I also like to use Google Scholar to search, especially when it comes to English-language texts. You will find it quite good.)                                                                                                                                                                                                                                                           |

*Note.* Single units of meaning are marked with – before the comments.

Table 5. Example of an individual argumentation behavior (English translation in parentheses)

| Code                   | Speaker                                                                                                                                                                                     | Utterance                                                                                                                                                                                                        |
|------------------------|---------------------------------------------------------------------------------------------------------------------------------------------------------------------------------------------|------------------------------------------------------------------------------------------------------------------------------------------------------------------------------------------------------------------|
| State/elab/information | A                                                                                                                                                                                           | - Als zweites würde ich diese Broschüre für Lehrkräfte auswählen,                                                                                                                                                |
| State/elab/information |                                                                                                                                                                                             | - welche sowohl rechtliche Informationen rund um das Thema Handynutzung enthält,                                                                                                                                 |
| State/elab/information |                                                                                                                                                                                             | - Gefahren aufzeigt,                                                                                                                                                                                             |
| State/elab/information |                                                                                                                                                                                             | - als auch konkrete Vorschläge zur Handhabung von Smartphones im Unterricht sowie zur produktiven Arbeit mit diesen macht (Umgang mit Audio-, Foto- und Videofunktion beim Lernen, Erstellung von Umfragen usw.) |
| State/elab/information |                                                                                                                                                                                             | - Sie ist 2014 entstanden und damit auch relativ aktuell.                                                                                                                                                        |
| State/elab/provider    |                                                                                                                                                                                             | - Die Website erscheint mir ebenfalls vertrauenswürdig, die Broschüre wurde vom österreichischen Bildungsministerium und der EU gefördert.                                                                       |
| State/elab/information |                                                                                                                                                                                             | -Allerdings ist es eine österreichische Broschüre und damit nicht zu 100% auf deutsche Schulen und deutsches Recht anwendbar.                                                                                    |
| State/elab/information |                                                                                                                                                                                             | (- Secondly, I would select this brochure for teachers,                                                                                                                                                          |
| State/elab/information |                                                                                                                                                                                             | - which contains legal information on the topic of cellphone use,                                                                                                                                                |
| State/elab/information |                                                                                                                                                                                             | - shows dangers,                                                                                                                                                                                                 |
| State/elab/information | - and makes specific suggestions on how to use smartphones in class and how to work productively with them (handling audio, photo and Video function when learning, creating surveys, etc.) |                                                                                                                                                                                                                  |
| State/elab/information | - It was created in 2014 and therefore also relatively up to date.                                                                                                                          |                                                                                                                                                                                                                  |
| State/elab/provider    | - The website also seems trustworthy to me, the brochure was funded by the Austrian Ministry of Education and the EU.                                                                       |                                                                                                                                                                                                                  |
| State/elab/information | - However, it is an Austrian brochure and therefore not 100% applicable to German schools and German law.)                                                                                  |                                                                                                                                                                                                                  |

*Note.* Single units of meaning are marked with – before the comments.
