# Supplementary material for: The role of collaborative argumentation in future teachers' selection of online information
Source: Atypon-hosted journal article supplement (doi:10.1024/1010-0652/a000307), 2021-02-12
Supplement: 1010-0652_a000307_esm5.pdf [file 1010-0652_a000307_esm5.pdf]

## Selected Web items

Table 1. Hyperlinks for the selected Web items.

| Unique links for Web items                                                                                                                                                                                                                                                                                                                                                                                                                                                                            | Science-related | Frequency of links among all four initially selected Web items for all participants |
|-------------------------------------------------------------------------------------------------------------------------------------------------------------------------------------------------------------------------------------------------------------------------------------------------------------------------------------------------------------------------------------------------------------------------------------------------------------------------------------------------------|-----------------|-------------------------------------------------------------------------------------|
| <a href="http://eprints.glos.ac.uk/5261/1/5261%20-%20Derounian%20-%202018%20-%20Mobiles%20in%20class.pdf">eprints.glos.ac.uk/5261/1/5261%20-%20Derounian%20-%202018%20-%20Mobiles%20in%20class.pdf</a>                                                                                                                                                                                                                                                                                                | Yes             | 1                                                                                   |
| <a href="http://cecs5580.pbworks.com/w/file/fetch/50303907/ET%20article%20Norris%20Soloway.pdf">http://cecs5580.pbworks.com/w/file/fetch/50303907/ET%20article%20Norris%20Soloway.pdf</a>                                                                                                                                                                                                                                                                                                             | Yes             | 1                                                                                   |
| <a href="http://pb21.de/2014/10/die-10-wichtigsten-fragen-zu-bring-device-byod-2/">http://pb21.de/2014/10/die-10-wichtigsten-fragen-zu-bring-device-byod-2/</a>                                                                                                                                                                                                                                                                                                                                       | No              | 1                                                                                   |
| <a href="http://www.bpb.de/lernen/digitale-bildung/medienpaedagogik/212391/handy-smartphone">http://www.bpb.de/lernen/digitale-bildung/medienpaedagogik/212391/handy-smartphone</a>                                                                                                                                                                                                                                                                                                                   | No              | 1                                                                                   |
| <a href="http://www1.landkreis-coburg.de/files/kim_1.pdf">http://www1.landkreis-coburg.de/files/kim_1.pdf</a>                                                                                                                                                                                                                                                                                                                                                                                         | Yes             | 1                                                                                   |
| <a href="https://content-select.com/de/portal/media/view/5c84e9c9-0abc-4184-a82d-646eb0dd2d03?forceauth=1">https://content-select.com/de/portal/media/view/5c84e9c9-0abc-4184-a82d-646eb0dd2d03?forceauth=1</a>                                                                                                                                                                                                                                                                                       | Yes             | 1                                                                                   |
| <a href="https://journals.univie.ac.at/index.php/mp/article/view/mi251/519">https://journals.univie.ac.at/index.php/mp/article/view/mi251/519</a>                                                                                                                                                                                                                                                                                                                                                     | Yes             | 1                                                                                   |
| <a href="https://link.springer.com/chapter/10.1007%2F978-3-319-02600-8_8">https://link.springer.com/chapter/10.1007%2F978-3-319-02600-8_8</a>                                                                                                                                                                                                                                                                                                                                                         | Yes             | 1                                                                                   |
| <a href="https://magazin.sofatutor.com/lehrer/smartphones-im-unterricht-ja-oder-nein/">https://magazin.sofatutor.com/lehrer/smartphones-im-unterricht-ja-oder-nein/</a>                                                                                                                                                                                                                                                                                                                               | No              | 21                                                                                  |
| <a href="https://sites.google.com/site/smartphonesimunterricht/pro-und-contra">https://sites.google.com/site/smartphonesimunterricht/pro-und-contra</a>                                                                                                                                                                                                                                                                                                                                               | No              | 2                                                                                   |
| <a href="https://www.bertelsmann-stiftung.de/de/themen/aktuelle-meldungen/2017/september/digitalisierung-an-schulen-der-geist-ist-willig-das-wlan-ist-schwach/">https://www.bertelsmann-stiftung.de/de/themen/aktuelle-meldungen/2017/september/digitalisierung-an-schulen-der-geist-ist-willig-das-wlan-ist-schwach/</a>                                                                                                                                                                             | Yes             | 1                                                                                   |
| <a href="https://www.bertelsmann-stiftung.de/fileadmin/files/BSt/Publikationen/GrauePublikationen/Studie_IB_Chancen_Risiken_digitale_Medien_2015.pdf">https://www.bertelsmann-stiftung.de/fileadmin/files/BSt/Publikationen/GrauePublikationen/Studie_IB_Chancen_Risiken_digitale_Medien_2015.pdf</a>                                                                                                                                                                                                 | Yes             | 2                                                                                   |
| <a href="https://www.bitkom.org/Presse/Presseinformation/Jung-digital-und-immer-online-Fuer-die-Generation-Z-gilt-mobile-first.html">https://www.bitkom.org/Presse/Presseinformation/Jung-digital-und-immer-online-Fuer-die-Generation-Z-gilt-mobile-first.html</a>                                                                                                                                                                                                                                   | Yes             | 1                                                                                   |
| <a href="https://www.bpb.de/lernen/digitale-bildung/werkstatt/268294/von-der-mediennutzung-zur-medienkompetenz">https://www.bpb.de/lernen/digitale-bildung/werkstatt/268294/von-der-mediennutzung-zur-medienkompetenz</a>                                                                                                                                                                                                                                                                             | No              | 1                                                                                   |
| <a href="https://www.cornelsen.de/magazin/beitraege/praxisideen-neue-medien-im-unterricht">https://www.cornelsen.de/magazin/beitraege/praxisideen-neue-medien-im-unterricht</a>                                                                                                                                                                                                                                                                                                                       | Yes             | 1                                                                                   |
| <a href="https://www.cornelsen.de/magazin/beitraege/schulrecht-handys-urheberrecht-unterrichtsmaterial">https://www.cornelsen.de/magazin/beitraege/schulrecht-handys-urheberrecht-unterrichtsmaterial</a>                                                                                                                                                                                                                                                                                             | Yes             | 3                                                                                   |
| <a href="https://www.focus.de/finanzen/experten/rechte-von-schuelern-und-lehrern-handyverbot-in-der-schule-was-geht-und-was-nicht_id_10497762.html">https://www.focus.de/finanzen/experten/rechte-von-schuelern-und-lehrern-handyverbot-in-der-schule-was-geht-und-was-nicht_id_10497762.html</a>                                                                                                                                                                                                     | No              | 1                                                                                   |
| <a href="https://www.grin.com/document/385702">https://www.grin.com/document/385702</a>                                                                                                                                                                                                                                                                                                                                                                                                               | Yes             | 1                                                                                   |
| <a href="https://www.handysektor.de/artikel/handyverbot-handyvereinbarung/">https://www.handysektor.de/artikel/handyverbot-handyvereinbarung/</a>                                                                                                                                                                                                                                                                                                                                                     | No              | 1                                                                                   |
| <a href="https://www.heise.de/select/ct/2018/21/1539409124587902">https://www.heise.de/select/ct/2018/21/1539409124587902</a>                                                                                                                                                                                                                                                                                                                                                                         | No              | 1                                                                                   |
| <a href="https://www.igi-global.com/gateway/chapter/full-text-html/198127">https://www.igi-global.com/gateway/chapter/full-text-html/198127</a>                                                                                                                                                                                                                                                                                                                                                       | Yes             | 1                                                                                   |
| <a href="https://www.lehrer-online.de/fokusthemen/extremismuspraevention/medien-zwischen-information-und-manipulation/unterrichtseinheit/ue/handy-in-der-schule-chancen-und-risiken/">https://www.lehrer-online.de/fokusthemen/extremismuspraevention/medien-zwischen-information-und-manipulation/unterrichtseinheit/ue/handy-in-der-schule-chancen-und-risiken/</a>                                                                                                                                 | No              | 10                                                                                  |
| <a href="https://www.lehrer-online.de/unterricht/sekundarstufen/faecheruebergreifend/unterrichtseinheit/seite/ue/smartphones-im-unterricht/einsatz-von-smartphones-im-unterricht/">https://www.lehrer-online.de/unterricht/sekundarstufen/faecheruebergreifend/unterrichtseinheit/seite/ue/smartphones-im-unterricht/einsatz-von-smartphones-im-unterricht/</a>                                                                                                                                       | No              | 7                                                                                   |
| <a href="https://www.lmz-bw.de/medien-und-bildung/jugendmedienschutz/smartphones-apps/umgang-mit-digitalen-endgeraeten-in-der-schule/#/medien-und-bildung/jugendmedienschutz/smartphones-apps/umgang-mit-digitalen-endgeraeten-in-der-schule/#c33695">https://www.lmz-bw.de/medien-und-bildung/jugendmedienschutz/smartphones-apps/umgang-mit-digitalen-endgeraeten-in-der-schule/#/medien-und-bildung/jugendmedienschutz/smartphones-apps/umgang-mit-digitalen-endgeraeten-in-der-schule/#c33695</a> | No              | 3                                                                                   |
| <a href="https://www.medien-in-die-schule.de/unterrichtseinheiten/jugend-und-handy/einfuehrung-jugend-und-handy-relevanz-hintergrund-und-ziel/">https://www.medien-in-die-schule.de/unterrichtseinheiten/jugend-und-handy/einfuehrung-jugend-und-handy-relevanz-hintergrund-und-ziel/</a>                                                                                                                                                                                                             | No              | 2                                                                                   |
| <a href="https://www.medienpaed.com/article/view/500/604">https://www.medienpaed.com/article/view/500/604</a>                                                                                                                                                                                                                                                                                                                                                                                         | Yes             | 11                                                                                  |
| <a href="https://www.mein-lernen.at/deutsch/eroerterung-handyverbot-an-schulen-pro-und-kontra-argumente">https://www.mein-lernen.at/deutsch/eroerterung-handyverbot-an-schulen-pro-und-kontra-argumente</a>                                                                                                                                                                                                                                                                                           | No              | 3                                                                                   |
| <a href="https://www.mpfs.de/studien/jim-studie/2016/">https://www.mpfs.de/studien/jim-studie/2016/</a>                                                                                                                                                                                                                                                                                                                                                                                               | Yes             | 1                                                                                   |
| <a href="https://www.netzwerk-digitale-bildung.de/information/schule/smartphones-im-unterricht/">https://www.netzwerk-digitale-bildung.de/information/schule/smartphones-im-unterricht/</a>                                                                                                                                                                                                                                                                                                           | No              | 22                                                                                  |
| <a href="https://www.saferinternet.at/fileadmin/categorized/Materialien/Das_Handy_in_der_Schule.pdf">https://www.saferinternet.at/fileadmin/categorized/Materialien/Das_Handy_in_der_Schule.pdf</a>                                                                                                                                                                                                                                                                                                   | No              | 2                                                                                   |
| <a href="https://www.welt.de/wissenschaft/article141084460/Smartphones-verbannen-ist-einfach-aber-nicht-klug.html">https://www.welt.de/wissenschaft/article141084460/Smartphones-verbannen-ist-einfach-aber-nicht-klug.html</a>                                                                                                                                                                                                                                                                       | No              | 12                                                                                  |
| <a href="https://www.youtube.com/watch?v=inIN3HiHL80">https://www.youtube.com/watch?v=inIN3HiHL80</a>                                                                                                                                                                                                                                                                                                                                                                                                 | No              | 3                                                                                   |
| <a href="https://www.youtube.com/watch?v=kaB5pe-2yBs">https://www.youtube.com/watch?v=kaB5pe-2yBs</a>                                                                                                                                                                                                                                                                                                                                                                                                 | No              | 2                                                                                   |
| <a href="https://www.zeit.de/gesellschaft/schule/2018-10/handyverbot-frankreich-schule-bildung/seite-2">https://www.zeit.de/gesellschaft/schule/2018-10/handyverbot-frankreich-schule-bildung/seite-2</a>                                                                                                                                                                                                                                                                                             | No              | 6                                                                                   |
| <a href="https://www.zeit.de/gesellschaft/zeitgeschehen/2018-12/handyverbot-grundschule-nutzungsverhalten-digitalpakt-pro-contra">https://www.zeit.de/gesellschaft/zeitgeschehen/2018-12/handyverbot-grundschule-nutzungsverhalten-digitalpakt-pro-contra</a>                                                                                                                                                                                                                                         | No              | 12                                                                                  |
| <a href="https://www.digibits.de/materialien/cybermobbing-erkennen-reagieren-vorbeugen/">https://www.digibits.de/materialien/cybermobbing-erkennen-reagieren-vorbeugen/</a>                                                                                                                                                                                                                                                                                                                           | No              | 3                                                                                   |

Electronic Supplement 5: FUTURE TEACHERS' REASONING FOR SELECTION OF ONLINE INFORMATION

|                                                                                                                                                                                                                                                                                                                                                                                                                                                                                                                                                                                                               |     |   |
|---------------------------------------------------------------------------------------------------------------------------------------------------------------------------------------------------------------------------------------------------------------------------------------------------------------------------------------------------------------------------------------------------------------------------------------------------------------------------------------------------------------------------------------------------------------------------------------------------------------|-----|---|
| <a href="http://ssw.jku.at/Teaching/MasterTheses/TechnologieImUnterricht/Diplomarbeit_Mitgutsch.pdf">http://ssw.jku.at/Teaching/MasterTheses/TechnologieImUnterricht/Diplomarbeit_Mitgutsch.pdf</a>                                                                                                                                                                                                                                                                                                                                                                                                           | Yes | 1 |
| <a href="http://www.projektschule-goldau.ch/wp-content/uploads/2010/06/2010-kaeser-et-al-iphone-projekt-goldau-evaluation-der-elternerwartungen.pdf">http://www.projektschule-goldau.ch/wp-content/uploads/2010/06/2010-kaeser-et-al-iphone-projekt-goldau-evaluation-der-elternerwartungen.pdf</a>                                                                                                                                                                                                                                                                                                           | Yes | 1 |
| <a href="https://archiv.berliner-zeitung.de/politik/meinung/pro-und-kontra-handy-verbot-auch-in-deutschen-klassenzimmern--31043128">https://archiv.berliner-zeitung.de/politik/meinung/pro-und-kontra-handy-verbot-auch-in-deutschen-klassenzimmern--31043128</a>                                                                                                                                                                                                                                                                                                                                             | No  | 1 |
| <a href="https://books.google.de/books?id=42pGDwAAQBAJ&amp;printsec=frontcover&amp;dq=handy+nutzung+sch%C3%BCler+unterricht&amp;hl=de&amp;sa=X&amp;ve">https://books.google.de/books?id=42pGDwAAQBAJ&amp;printsec=frontcover&amp;dq=handy+nutzung+sch%C3%BCler+unterricht&amp;hl=de&amp;sa=X&amp;ve</a>                                                                                                                                                                                                                                                                                                       | Yes | 1 |
| <a href="https://cep.lse.ac.uk/pubs/download/dp1350.pdf">https://cep.lse.ac.uk/pubs/download/dp1350.pdf</a>                                                                                                                                                                                                                                                                                                                                                                                                                                                                                                   | Yes | 5 |
| <a href="https://deutsches-schulportal.de/schulkultur/eltern-wollen-handyverbot-in-der-schule/">https://deutsches-schulportal.de/schulkultur/eltern-wollen-handyverbot-in-der-schule/</a>                                                                                                                                                                                                                                                                                                                                                                                                                     | No  | 1 |
| <a href="https://deutsches-schulportal.de/stimmen/digitale-bildung-handybesitzpflicht-und-andere-missverstaendnisse/">https://deutsches-schulportal.de/stimmen/digitale-bildung-handybesitzpflicht-und-andere-missverstaendnisse/</a>                                                                                                                                                                                                                                                                                                                                                                         | No  | 1 |
| <a href="https://eric.ed.gov/?id=ED539398">https://eric.ed.gov/?id=ED539398</a>                                                                                                                                                                                                                                                                                                                                                                                                                                                                                                                               | Yes | 2 |
| <a href="https://irights.info/artikel/faq-handys-schule-was-ist-erlaubt/24289">https://irights.info/artikel/faq-handys-schule-was-ist-erlaubt/24289</a>                                                                                                                                                                                                                                                                                                                                                                                                                                                       | No  | 1 |
| <a href="https://journals.univie.ac.at/index.php/mp/article/view/mi561/782">https://journals.univie.ac.at/index.php/mp/article/view/mi561/782</a>                                                                                                                                                                                                                                                                                                                                                                                                                                                             | Yes | 1 |
| <a href="https://kobra.uni-kassel.de/themes/Mirage2/scripts/mozilla-pdf.js/web/viewer.html?file=/bitstream/handle/123456789/2011071938349/WeberFilmeBiologieunterricht.pdf?sequence=6&amp;isAllowed=y">https://kobra.uni-kassel.de/themes/Mirage2/scripts/mozilla-pdf.js/web/viewer.html?file=/bitstream/handle/123456789/2011071938349/WeberFilmeBiologieunterricht.pdf?sequence=6&amp;isAllowed=y</a>                                                                                                                                                                                                       | Yes | 1 |
| <a href="https://lehrerfortbildung-bw.de/st_recht/weit/handy/">https://lehrerfortbildung-bw.de/st_recht/weit/handy/</a>                                                                                                                                                                                                                                                                                                                                                                                                                                                                                       | No  | 1 |
| <a href="https://magazin.sofatutor.com/lehrer/icils-studie-medienkompetenz-der-schueler-das-sagen-lehrer-dazu/">https://magazin.sofatutor.com/lehrer/icils-studie-medienkompetenz-der-schueler-das-sagen-lehrer-dazu/</a>                                                                                                                                                                                                                                                                                                                                                                                     | No  | 1 |
| <a href="https://www.bigkarriere.de/karrierewelt/schule/smartphone-im-klassenzimmer">https://www.bigkarriere.de/karrierewelt/schule/smartphone-im-klassenzimmer</a>                                                                                                                                                                                                                                                                                                                                                                                                                                           | No  | 1 |
| <a href="https://www.hanisauland.de/spezial/deine-meinung/deine-meinung-handyverbot/">https://www.hanisauland.de/spezial/deine-meinung/deine-meinung-handyverbot/</a>                                                                                                                                                                                                                                                                                                                                                                                                                                         | No  | 1 |
| <a href="https://www.kmk.org/aktuelles/artikelansicht/strategie-bildung-in-der-digitalen-welt.html">https://www.kmk.org/aktuelles/artikelansicht/strategie-bildung-in-der-digitalen-welt.html</a>                                                                                                                                                                                                                                                                                                                                                                                                             | No  | 1 |
| <a href="https://www.lehrer-online.de/unterricht/sekundarstufen/geisteswissenschaften/deutsch/unterrichtseinheit/ue/whatsapp-fluch-oder-segen/">https://www.lehrer-online.de/unterricht/sekundarstufen/geisteswissenschaften/deutsch/unterrichtseinheit/ue/whatsapp-fluch-oder-segen/</a>                                                                                                                                                                                                                                                                                                                     | No  | 1 |
| <a href="https://www.medien-in-die-schule.de/unterrichtseinheiten/jugend-und-handy/modul-3-lernen-mit-smartphone-und-co/">https://www.medien-in-die-schule.de/unterrichtseinheiten/jugend-und-handy/modul-3-lernen-mit-smartphone-und-co/</a>                                                                                                                                                                                                                                                                                                                                                                 | No  | 1 |
| <a href="https://www.researchgate.net/profile/Martin_Ebner2/publication/277923980_25_Jahre_Digitale_Schule_in_Osterreich/links/57">https://www.researchgate.net/profile/Martin_Ebner2/publication/277923980_25_Jahre_Digitale_Schule_in_Osterreich/links/57</a>                                                                                                                                                                                                                                                                                                                                               | Yes | 1 |
| <a href="https://www.verbraucherbildung.de/material/handy-im-unterricht-na-klar#materialBody">https://www.verbraucherbildung.de/material/handy-im-unterricht-na-klar#materialBody</a>                                                                                                                                                                                                                                                                                                                                                                                                                         | No  | 1 |
| <a href="https://www.waldorfschule.de/elternstudie/">https://www.waldorfschule.de/elternstudie/</a>                                                                                                                                                                                                                                                                                                                                                                                                                                                                                                           | No  | 1 |
| <a href="https://www.watson.ch/schweiz/gesellschaft%20&amp;%20politik/835460018-medienpaedagoge-philippe-wampfler-smarte-geraete-geho">https://www.watson.ch/schweiz/gesellschaft%20&amp;%20politik/835460018-medienpaedagoge-philippe-wampfler-smarte-geraete-geho</a>                                                                                                                                                                                                                                                                                                                                       | No  | 3 |
| <a href="https://www.youtube.com/watch?v=YtedK7xS2Ew">https://www.youtube.com/watch?v=YtedK7xS2Ew</a>                                                                                                                                                                                                                                                                                                                                                                                                                                                                                                         | No  | 1 |
| <a href="https://www.spiegel.de/lebenundlernen/schule/handys-in-der-schule-ohne-smartphones-mehr-konzentration-a-1036911.html">https://www.spiegel.de/lebenundlernen/schule/handys-in-der-schule-ohne-smartphones-mehr-konzentration-a-1036911.html</a>                                                                                                                                                                                                                                                                                                                                                       | No  | 2 |
| <a href="https://www.spiegel.de/lebenundlernen/schule/smartphone-in-schule-mehrheit-der-eltern-will-handyverbot-a-1288550.html">https://www.spiegel.de/lebenundlernen/schule/smartphone-in-schule-mehrheit-der-eltern-will-handyverbot-a-1288550.html</a>                                                                                                                                                                                                                                                                                                                                                     | No  | 2 |
| <a href="https://medienundbildung.com/uploads/tx_ttproducts/datasheet/Taschenfunk_Broschuere.pdf">https://medienundbildung.com/uploads/tx_ttproducts/datasheet/Taschenfunk_Broschuere.pdf</a>                                                                                                                                                                                                                                                                                                                                                                                                                 | No  | 1 |
| <a href="https://www.bildungsserver.de/elixier/elixier2_list.php?feldinhalt1=Handynutzung+unterrichtsmaterial&amp;mtz=10&amp;suche=einfach">https://www.bildungsserver.de/elixier/elixier2_list.php?feldinhalt1=Handynutzung+unterrichtsmaterial&amp;mtz=10&amp;suche=einfach</a>                                                                                                                                                                                                                                                                                                                             | No  | 1 |
| <a href="https://www.education.gouv.fr/cid133479/interdiction-telephone-portable-dans-les-ecoles-les-colleges.html">https://www.education.gouv.fr/cid133479/interdiction-telephone-portable-dans-les-ecoles-les-colleges.html</a>                                                                                                                                                                                                                                                                                                                                                                             | No  | 1 |
| <a href="https://www.goettinger-tageblatt.de/Nachrichten/Politik/Deutschland-Welt/Deutscher-Lehrerverband-verlangt-Handyverbot-fuer-Schueler-bis-14-Jahre">https://www.goettinger-tageblatt.de/Nachrichten/Politik/Deutschland-Welt/Deutscher-Lehrerverband-verlangt-Handyverbot-fuer-Schueler-bis-14-Jahre</a>                                                                                                                                                                                                                                                                                               | No  | 1 |
| <a href="https://fue-wiki.tubit.tu-berlin.de/lib/exe/fetch.php/lehrveranstaltungen:leitbilder:ausarbeitung_sandy_roigk.pdf">https://fue-wiki.tubit.tu-berlin.de/lib/exe/fetch.php/lehrveranstaltungen:leitbilder:ausarbeitung_sandy_roigk.pdf</a>                                                                                                                                                                                                                                                                                                                                                             | Yes | 3 |
| <a href="https://esv-campus.de/.download/ sid/ECON-116256-myr0/118150/fd_20145111.pdf">https://esv-campus.de/.download/ sid/ECON-116256-myr0/118150/fd_20145111.pdf</a>                                                                                                                                                                                                                                                                                                                                                                                                                                       | Yes | 1 |
| <a href="https://docplayer.org/525308-Handy-in-der-schule-unterrichtsmaterialien-mit-uebungen-fuer-den-unterricht-mit-chancen-und-risiken-kompetent-umgehen.html">https://docplayer.org/525308-Handy-in-der-schule-unterrichtsmaterialien-mit-uebungen-fuer-den-unterricht-mit-chancen-und-risiken-kompetent-umgehen.html</a>                                                                                                                                                                                                                                                                                 | No  | 1 |
| <a href="https://esv-campus.de/ce/fremdsprache-deutsch-ausgabe-53-2015/ sid/SFLR-999347-9tWq/ejournal-archiv.html">https://esv-campus.de/ce/fremdsprache-deutsch-ausgabe-53-2015/ sid/SFLR-999347-9tWq/ejournal-archiv.html</a>                                                                                                                                                                                                                                                                                                                                                                               | Yes | 1 |
| <a href="https://hu-berlin.hosted.exlibrisgroup.com/primo-explore/fulldisplay?docid=HUB_UB_ALMA_DS21672285730002882&amp;context=L&amp;vid=hub_ub&amp;lang=de_DE&amp;search_scope=default_scope&amp;adaptor=Local%20Search%20Engine&amp;tab=default_tab&amp;query=any,contains,didaktik%20handy&amp;offse">https://hu-berlin.hosted.exlibrisgroup.com/primo-explore/fulldisplay?docid=HUB_UB_ALMA_DS21672285730002882&amp;context=L&amp;vid=hub_ub&amp;lang=de_DE&amp;search_scope=default_scope&amp;adaptor=Local%20Search%20Engine&amp;tab=default_tab&amp;query=any,contains,didaktik%20handy&amp;offse</a> | Yes | 1 |
| <a href="https://hu-berlin.hosted.exlibrisgroup.com/primo-explore/fulldisplay?docid=TN_dipf_s1122837&amp;context=PC&amp;vid=hub_ub&amp;lang=de_DE&amp;search_scope=default_scope&amp;adaptor=primo_central_multiple_fe&amp;tab=default_tab&amp;query=any,contains,Digitale%20Lernwerkzeuge&amp;offset=0">https://hu-berlin.hosted.exlibrisgroup.com/primo-explore/fulldisplay?docid=TN_dipf_s1122837&amp;context=PC&amp;vid=hub_ub&amp;lang=de_DE&amp;search_scope=default_scope&amp;adaptor=primo_central_multiple_fe&amp;tab=default_tab&amp;query=any,contains,Digitale%20Lernwerkzeuge&amp;offset=0</a>   | Yes | 1 |
| <a href="https://pinklunapanther.wordpress.com/2017/10/27/digitale-mediennutzung-an-skandinavischen-schulen/">https://pinklunapanther.wordpress.com/2017/10/27/digitale-mediennutzung-an-skandinavischen-schulen/</a>                                                                                                                                                                                                                                                                                                                                                                                         | No  | 2 |
| <a href="https://www.tagesspiegel.de/politik/digitales-leben-sind-smartphones-und-tablets-fuer-kinder-schaedlich/25172782.html">https://www.tagesspiegel.de/politik/digitales-leben-sind-smartphones-und-tablets-fuer-kinder-schaedlich/25172782.html</a>                                                                                                                                                                                                                                                                                                                                                     | No  | 1 |
| <a href="https://www.youtube.com/watch?v=CDOHqy-W88U">https://www.youtube.com/watch?v=CDOHqy-W88U</a>                                                                                                                                                                                                                                                                                                                                                                                                                                                                                                         | No  | 1 |
| <a href="https://www.youtube.com/watch?v=mSmaZjE5ZJM">https://www.youtube.com/watch?v=mSmaZjE5ZJM</a>                                                                                                                                                                                                                                                                                                                                                                                                                                                                                                         | No  | 1 |
| <a href="https://www.zdf.de/nachrichten/heute/frankreich-handyverbot-in-schulen-100.html">https://www.zdf.de/nachrichten/heute/frankreich-handyverbot-in-schulen-100.html</a>                                                                                                                                                                                                                                                                                                                                                                                                                                 | No  | 1 |

<https://doi.org/10.1024/1010-0652/a000307>

Electronic Supplement 5: FUTURE TEACHERS' REASONING FOR SELECTION OF ONLINE INFORMATION

|                                                                                                                                                                                                                                                                                                                                                                                                                                                                                                                                                                                                               |     |     |
|---------------------------------------------------------------------------------------------------------------------------------------------------------------------------------------------------------------------------------------------------------------------------------------------------------------------------------------------------------------------------------------------------------------------------------------------------------------------------------------------------------------------------------------------------------------------------------------------------------------|-----|-----|
| <a href="https://www.grin.com/document/276193">https://www.grin.com/document/276193</a>                                                                                                                                                                                                                                                                                                                                                                                                                                                                                                                       | Yes | 2   |
| <a href="https://www.handelsblatt.com/politik/deutschland/digitalisierung-warum-das-smartphone-in-den-unterricht-gehört/22887768.html?ticket=ST-10728272-dgk3WHLd3cTv1Im9Ka7d-ap2">https://www.handelsblatt.com/politik/deutschland/digitalisierung-warum-das-smartphone-in-den-unterricht-gehört/22887768.html?ticket=ST-10728272-dgk3WHLd3cTv1Im9Ka7d-ap2</a>                                                                                                                                                                                                                                               | No  | 2   |
| <a href="https://magazin.sofatutor.com/lehrer/smartphones-im-unterricht-ich-habe-noch-nie-so-gute-ergebnisse-erzielt/">https://magazin.sofatutor.com/lehrer/smartphones-im-unterricht-ich-habe-noch-nie-so-gute-ergebnisse-erzielt/</a>                                                                                                                                                                                                                                                                                                                                                                       | No  | 1   |
| <a href="https://link.springer.com/article/10.1007/s10639-017-9572-7">https://link.springer.com/article/10.1007/s10639-017-9572-7</a>                                                                                                                                                                                                                                                                                                                                                                                                                                                                         | Yes | 1   |
| <a href="https://learninglab.uni-due.de/sites/default/files/DDS-Digitalisierung-190417.pdf">https://learninglab.uni-due.de/sites/default/files/DDS-Digitalisierung-190417.pdf</a>                                                                                                                                                                                                                                                                                                                                                                                                                             | Yes | 2   |
| <a href="https://hu-berlin.hosted.exlibrisgroup.com/primo-explore/fulldisplay?docid=HUB_UB_ALMA_DS21596543100002882&amp;context=L&amp;vid=hub_ub&amp;lang=de_DE&amp;search_scope=default_scope&amp;adaptor=Local%20Search%20Engine&amp;tab=default_tab&amp;query=any,contains,didaktik%20handy&amp;offse">https://hu-berlin.hosted.exlibrisgroup.com/primo-explore/fulldisplay?docid=HUB_UB_ALMA_DS21596543100002882&amp;context=L&amp;vid=hub_ub&amp;lang=de_DE&amp;search_scope=default_scope&amp;adaptor=Local%20Search%20Engine&amp;tab=default_tab&amp;query=any,contains,didaktik%20handy&amp;offse</a> | Yes | 1   |
| <a href="https://deutsches-schulportal.de/schulkultur/debatte-ist-das-handyverbot-an-schulen-noch-zeitgemaess/">https://deutsches-schulportal.de/schulkultur/debatte-ist-das-handyverbot-an-schulen-noch-zeitgemaess/</a>                                                                                                                                                                                                                                                                                                                                                                                     | No  | 1   |
| <a href="https://de.statista.com/statistik/daten/studie/387057/umfrage/umfrage-zur-nutzung-von-handys-in-deutschen-schulen/">https://de.statista.com/statistik/daten/studie/387057/umfrage/umfrage-zur-nutzung-von-handys-in-deutschen-schulen/</a>                                                                                                                                                                                                                                                                                                                                                           | No  | 1   |
| <a href="https://connectusfund.org/18-cell-phones-in-the-classroom-pros-and-cons">https://connectusfund.org/18-cell-phones-in-the-classroom-pros-and-cons</a>                                                                                                                                                                                                                                                                                                                                                                                                                                                 | No  | 1   |
| <a href="https://www.educa.ch/sites/default/files/mobilelearning_d.pdf">https://www.educa.ch/sites/default/files/mobilelearning_d.pdf</a>                                                                                                                                                                                                                                                                                                                                                                                                                                                                     | No  | 1   |
| <a href="https://kluedo.ub.uni-kl.de/frontdoor/deliver/index/docId/2709/file/3-Kluedo.pdf">https://kluedo.ub.uni-kl.de/frontdoor/deliver/index/docId/2709/file/3-Kluedo.pdf</a>                                                                                                                                                                                                                                                                                                                                                                                                                               | Yes | 1   |
| <a href="https://www.klicksafe.de/fileadmin/media/documents/pdf/klicksafe_Materialien/iRights_Themenreihe/S">https://www.klicksafe.de/fileadmin/media/documents/pdf/klicksafe_Materialien/iRights_Themenreihe/S</a>                                                                                                                                                                                                                                                                                                                                                                                           | No  | 1   |
| <a href="https://www.univie.ac.at/pluslucis/PlusLucis/151/S08.pdf">https://www.univie.ac.at/pluslucis/PlusLucis/151/S08.pdf</a>                                                                                                                                                                                                                                                                                                                                                                                                                                                                               | Yes | 1   |
| <a href="http://www.informationszentrum-mobilfunk.de/wirtschaft-gesellschaft/mobile-gesellschaft/kinder-jugendliche">http://www.informationszentrum-mobilfunk.de/wirtschaft-gesellschaft/mobile-gesellschaft/kinder-jugendliche</a>                                                                                                                                                                                                                                                                                                                                                                           | No  | 1   |
| <a href="http://www.ipadatschool.de/index.php/grundlagen-s/9793-besser-lernen-mit-digitalen-medien-w-wie-wissen">http://www.ipadatschool.de/index.php/grundlagen-s/9793-besser-lernen-mit-digitalen-medien-w-wie-wissen</a>                                                                                                                                                                                                                                                                                                                                                                                   | No  | 1   |
| <a href="https://anwaltauskunft.de/magazin/gesellschaft/bildung-forschung/handy-in-der-schule-was-ist-erlaubt">https://anwaltauskunft.de/magazin/gesellschaft/bildung-forschung/handy-in-der-schule-was-ist-erlaubt</a>                                                                                                                                                                                                                                                                                                                                                                                       | No  | 1   |
| <a href="https://bildungspakt-bayern.de/einsatz-mobiler-endgeraete-im-unterricht/">https://bildungspakt-bayern.de/einsatz-mobiler-endgeraete-im-unterricht/</a>                                                                                                                                                                                                                                                                                                                                                                                                                                               | No  | 1   |
| <a href="https://www.multiplikatoren.ins-netz-gehen.de/informationen/fuer-lehrkraefte/handy-und-smartphone-im-unterricht-tipps-fuer-lehrkraefte">https://www.multiplikatoren.ins-netz-gehen.de/informationen/fuer-lehrkraefte/handy-und-smartphone-im-unterricht-tipps-fuer-lehrkraefte</a>                                                                                                                                                                                                                                                                                                                   | No  | 1   |
| <a href="https://www.ndr.de/radiomv/Schlaue-Handys-dumme-Teenager,newcomerschwerin100.html">https://www.ndr.de/radiomv/Schlaue-Handys-dumme-Teenager,newcomerschwerin100.html</a>                                                                                                                                                                                                                                                                                                                                                                                                                             | No  | 1   |
| <a href="https://www.repo.uni-hannover.de/handle/123456789/2946">https://www.repo.uni-hannover.de/handle/123456789/2946</a>                                                                                                                                                                                                                                                                                                                                                                                                                                                                                   | Yes | 1   |
| <a href="https://www.schule.at/tools/werkzeuge-fuer-den-unterricht.html">https://www.schule.at/tools/werkzeuge-fuer-den-unterricht.html</a>                                                                                                                                                                                                                                                                                                                                                                                                                                                                   | No  | 1   |
| <a href="https://www.youtube.com/watch?v=5PZ8NEXiGJY">https://www.youtube.com/watch?v=5PZ8NEXiGJY</a>                                                                                                                                                                                                                                                                                                                                                                                                                                                                                                         | No  | 1   |
| <a href="https://www.weser-kurier.de/bremen/bremen-stadt_artikel,-pro-und-contra-handys-in-der-schule- arid,1757407.html">https://www.weser-kurier.de/bremen/bremen-stadt_artikel,-pro-und-contra-handys-in-der-schule- arid,1757407.html</a>                                                                                                                                                                                                                                                                                                                                                                 | No  | 1   |
| <a href="https://www.umwelt-im-unterricht.de/hintergrund/smartphones-apps-und-kompetenzen-fuer-die-digitale-welt/">https://www.umwelt-im-unterricht.de/hintergrund/smartphones-apps-und-kompetenzen-fuer-die-digitale-welt/</a>                                                                                                                                                                                                                                                                                                                                                                               | No  | 1   |
| <a href="https://www.theglobeandmail.com/opinion/article-we-should-ban-cellphones-from-classrooms-and-the-research-backs-that/">https://www.theglobeandmail.com/opinion/article-we-should-ban-cellphones-from-classrooms-and-the-research-backs-that/</a>                                                                                                                                                                                                                                                                                                                                                     | No  | 1   |
| <a href="https://www.tagesspiegel.de/berlin/pro-und-contra-soll-internetkompetenz-ein-neues-schulfach-werden/1964978.html">https://www.tagesspiegel.de/berlin/pro-und-contra-soll-internetkompetenz-ein-neues-schulfach-werden/1964978.html</a>                                                                                                                                                                                                                                                                                                                                                               | No  | 1   |
| <a href="https://www.spiegel.de/lebenundlernen/schule/handys-an-schulen-verbieten-oder-nutzen-a-1052554.html">https://www.spiegel.de/lebenundlernen/schule/handys-an-schulen-verbieten-oder-nutzen-a-1052554.html</a>                                                                                                                                                                                                                                                                                                                                                                                         | No  | 1   |
| <a href="https://www.nytimes.com/2018/09/20/world/europe/france-smartphones-schools.html">https://www.nytimes.com/2018/09/20/world/europe/france-smartphones-schools.html</a>                                                                                                                                                                                                                                                                                                                                                                                                                                 | No  | 1   |
| <a href="https://www.br.de/nachrichten/bayern/kein-generelles-handyverbot-an-schulen,QiP5dgo">https://www.br.de/nachrichten/bayern/kein-generelles-handyverbot-an-schulen,QiP5dgo</a>                                                                                                                                                                                                                                                                                                                                                                                                                         | No  | 1   |
| <a href="https://www.betreut.de/magazin/kinder/handy-in-der-schule-ja-oder-nein/">https://www.betreut.de/magazin/kinder/handy-in-der-schule-ja-oder-nein/</a>                                                                                                                                                                                                                                                                                                                                                                                                                                                 | No  | 1   |
| <a href="https://www.berlin.de/sen/bildung/schule/digitale-schule/digitalpakt/">https://www.berlin.de/sen/bildung/schule/digitale-schule/digitalpakt/</a>                                                                                                                                                                                                                                                                                                                                                                                                                                                     | No  | 1   |
| <a href="https://journals.univie.ac.at/index.php/mp/article/download/mi975/1108">https://journals.univie.ac.at/index.php/mp/article/download/mi975/1108</a>                                                                                                                                                                                                                                                                                                                                                                                                                                                   | Yes | 1   |
| <a href="https://books.google.de/books?hl=de&amp;lr=&amp;id=3Et3DwAAQBAJ&amp;oi=fnd&amp;pg=PA11&amp;dq=apps+f%C3%BCr+interaktiven+unterricht&amp;ots=j8ZKOJWzh1&amp;sig=KTBVWMEHq8bXcp39oQXOf2BKUIU#v=snippet&amp;q=Smartphone&amp;f=false">https://books.google.de/books?hl=de&amp;lr=&amp;id=3Et3DwAAQBAJ&amp;oi=fnd&amp;pg=PA11&amp;dq=apps+f%C3%BCr+interaktiven+unterricht&amp;ots=j8ZKOJWzh1&amp;sig=KTBVWMEHq8bXcp39oQXOf2BKUIU#v=snippet&amp;q=Smartphone&amp;f=false</a>                                                                                                                             | Yes | 1   |
| Total                                                                                                                                                                                                                                                                                                                                                                                                                                                                                                                                                                                                         |     | 232 |
